# Supplementary material for: The Cascade of Care for Hepatitis C Treatment in Rwanda: A Retrospective Cohort Study of the 2017–2019 Mass Screening and Treatment Campaign
Source: MDPI journal article supplement (doi:10.3390/v15030661), 2023-02-28
Supplement: s1 [file s1]

**Table S1.** Patients' characteristics per treatment outcome.

| Variables                                           | Total sample | Cured | Failed | Death | Discontinuation | Total |
|-----------------------------------------------------|--------------|-------|--------|-------|-----------------|-------|
| <44                                                 | 1,591        | 13    | 14.4   | 0     | 10.2            | 12.3  |
| 44-54                                               | 1,573        | 13.5  | 14     | 3.6   | 8.7             | 12.2  |
| 55-64                                               | 2,977        | 25.1  | 24.9   | 16.1  | 17.6            | 23    |
| 64+                                                 | 6,799        | 48.4  | 46.7   | 80.4  | 63.5            | 52.5  |
| Total                                               | 12,940       | 100   | 100    | 100   | 100             | 100   |
| Sex                                                 |              |       |        |       |                 |       |
| Female                                              | 7,965        | 60.8  | 59.3   | 48.2  | 64.3            | 61.6  |
| Male                                                | 4,974        | 39.2  | 40.7   | 51.8  | 35.7            | 38.4  |
| Total                                               | 12,939       | 100   | 100    | 100   | 100             | 100   |
| Social Economic Status                              |              |       |        |       |                 |       |
| Category 1                                          | 2,587        | 23.9  | 26.6   | 29.2  | 31              | 25.8  |
| Category 2                                          | 3,305        | 33.7  | 32.1   | 18.8  | 31.7            | 33    |
| Category 3 or 4 or unknown                          | 4,124        | 42.5  | 41.3   | 52.1  | 37.2            | 41.2  |
| Total                                               | 10,016       | 100   | 100    | 100   | 100             | 100   |
| Marital status                                      |              |       |        |       |                 |       |
| Single                                              | 3,780        | 12.1  | 25.1   | 25    | 70.3            | 29.2  |
| Married or in union                                 | 6,390        | 61.6  | 52.3   | 42.9  | 20.3            | 49.4  |
| Separated/divorced/Widow                            | 2,770        | 26.3  | 22.6   | 32.1  | 9.4             | 21.4  |
| Total                                               | 12,940       | 100   | 100    | 100   | 100             | 100   |
| Health Insurance                                    |              |       |        |       |                 |       |
| No insurance                                        | 2,611        | 4.7   | 10.5   | 16.1  | 59              | 20.2  |
| Community insurance                                 | 9,942        | 91.8  | 86.4   | 75    | 39.2            | 76.8  |
| Private or other government insurance<br>RAMA/RSSB) | 387          | 3.5   | 3.1    | 8.9   | 1.8             | 3     |
| Total                                               | 12,940       | 100   | 100    | 100   | 100             | 100   |
| Diabetes status                                     |              |       |        |       |                 |       |
| No                                                  | 9,688        | 97.3  | 96.5   | 84.4  | 97.9            | 97.2  |
| Yes                                                 | 274          | 2.7   | 3.5    | 15.6  | 2.1             | 2.8   |
| Total                                               | 9,962        | 100   | 100    | 100   | 100             | 100   |
| HIV status                                          |              |       |        |       |                 |       |
| No                                                  | 8,970        | 89.3  | 90.5   | 77.3  | 94.2            | 90    |
| Yes                                                 | 1,002        | 10.7  | 9.5    | 22.7  | 5.8             | 10    |
| Total                                               | 9,972        | 100   | 100    | 100   | 100             | 100   |
| Cancer status                                       |              |       |        |       |                 |       |
| No                                                  | 9,827        | 98.7  | 99.1   | 86.7  | 99.3            | 98.7  |
| Yes                                                 | 126          | 1.3   | 0.9    | 13.3  | 0.7             | 1.3   |
| Total                                               | 9,953        | 100   | 100    | 100   | 100             | 100   |
| Family History of Viral Hepatitis                   |              |       |        |       |                 |       |
| No                                                  | 9,253        | 95.1  | 92.9   | 95.5  | 98.3            | 95.3  |
| Yes                                                 | 459          | 4.9   | 7.1    | 4.5   | 1.7             | 4.7   |
| Total                                               | 9,712        | 100   | 100    | 100   | 100             | 100   |
| Renal failure status                                |              |       |        |       |                 |       |
| No                                                  | 12,769       | 98.2  | 99     | 96.4  | 99.7            | 98.7  |
| Yes                                                 | 171          | 1.8   | 1      | 3.6   | 0.3             | 1.3   |
| Total                                               | 12,940       | 100   | 100    | 100   | 100             | 100   |
| HTA status                                          |              |       |        |       |                 |       |
| No                                                  | 11,672       | 87.5  | 88.5   | 76.8  | 97.3            | 90.2  |
| Yes                                                 | 1,268        | 12.5  | 11.5   | 23.2  | 2.7             | 9.8   |
| Total                                               | 12,940       | 100   | 100    | 100   | 100             | 100   |
| HBV result                                          |              |       |        |       |                 |       |
| Negative                                            | 10,421       | 98.6  | 97.6   | 100   | 98.5            | 98.5  |
| Positive                                            | 163          | 1.4   | 2.4    | 0     | 1.5             | 1.5   |
| Total                                               | 10,584       | 100   | 100    | 100   | 100             | 100   |
| HCV treatment history                               |              |       |        |       |                 |       |
| No                                                  | 11,701       | 88.8  | 85.1   | 96.4  | 99.7            | 91.6  |
| Yes                                                 | 1,077        | 11.2  | 14.9   | 3.6   | 0.3             | 8.4   |
| Total                                               | 12,778       | 100   | 100    | 100   | 100             | 100   |
| Treatment regimen                                   |              |       |        |       |                 |       |
| HARVONI                                             | 3,452        | 37.2  | 22     | 42.9  | 3.6             | 26.7  |
| SOF+DCV                                             | 4,761        | 52.7  | 31.5   | 17.9  | 1.8             | 36.8  |
| Other combination                                   | 4,727        | 10.1  | 46.5   | 39.3  | 94.7            | 36.5  |

|                                  |        |           |           |           |           |           |
|----------------------------------|--------|-----------|-----------|-----------|-----------|-----------|
| Total                            | 12,940 | 100       | 100       | 100       | 100       | 100       |
| Ever been traditionally operated |        |           |           |           |           |           |
| No                               | 8,009  | 81.2      | 78.5      | 66.7      | 84.3      | 81.3      |
| Yes                              | 1,848  | 18.8      | 21.5      | 33.3      | 15.7      | 18.7      |
| Total                            | 9,857  | 100       | 100       | 100       | 100       | 100       |
| Ever been transfused             |        |           |           |           |           |           |
| No                               | 9,584  | 96.8      | 96.8      | 91.1      | 98.5      | 97        |
| Yes                              | 297    | 3.2       | 3.2       | 8.9       | 1.5       | 3         |
| Total                            | 9,881  | 100       | 100       | 100       | 100       | 100       |
| Ever been operated               |        |           |           |           |           |           |
| No                               | 9,552  | 96.5      | 96        | 93.3      | 96.3      | 96.4      |
| Yes                              | 353    | 3.5       | 4         | 6.7       | 3.7       | 3.6       |
| Total                            | 9,905  | 100       | 100       | 100       | 100       | 100       |
| Mean baseline Viral load(IU/mL)  | 12,940 | 2,092,958 | 3,712,036 | 1,030,728 | 1,948,949 | 2,155,255 |
| Mean number of hospital staff    | 12,940 | 224       | 214       | 363       | 256       | 232       |

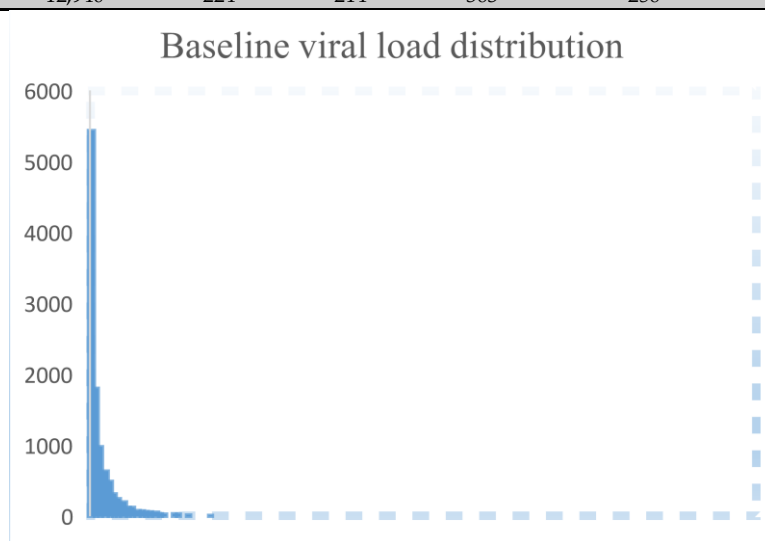

**Figure S1.** Baseline viral load distribution plot.
